# Supplementary material for: Notch Signaling Activation Is Associated with Patient Mortality and Increased FGF1-Mediated Invasion in Squamous Cell Carcinoma of the Oral Cavity
Source: Oxford University Press journal article supplement (doi:10.1158/1541-7786.mcr-16-0114), 2016-06-29
Supplement: 15417786mcr160114-sup-164642_1_supp_3542139_t8tjdl.docx [file 15417786mcr160114-sup-164642_1_supp_3542139_t8tjdl.docx]

**Supplemental Figure Legends**

**Supplemental Figure 1. Clustering and gene set enrichment analyses in UAB OSCC samples.** (A) Unsupervised hierarchical clustering of UAB OSCC samples using NanoString gene expression data. Samples from patients with cancer-specific mortality (CSM) are identified by a yellow box in the legend at the top of the figure. Location of Notch pathway genes is indicated to the right. (B) Enrichment plot for the Notch signaling pathway in UAB OSCC samples. The enrichment score and normalized enrichment score were -0.306 and -0.941, respectively, with a nominal p-value=0.523. (C) Comparative biomarker analysis of UAB OSCC samples. Samples from patients with CSM are identified by a yellow box in the legend at the top of the figure. Location of Notch pathway genes is indicated to the right.

**Supplemental Figure 2. Clustering and gene set enrichment analyses in TCGA OSCC samples.** (A) Unsupervised hierarchical clustering of TCGA OSCC samples using RNAseq gene expression data. Samples from patients with all-cause mortality (ACM) are identified by a yellow box in the legend at the top of the figure. Location of Notch pathway genes is indicated to the right. (B) Comparative biomarker analysis of TCGA OSCC samples. Samples from patients with ACS are identified by a yellow box in the legend at the top of the figure. Location of Notch pathway genes is indicated to the right.

**Supplemental Figure 3. Notch-mediated increases in cell migration and invasion are dependent on FGF1 expression in the FaDu cell line.** (A) FaDu cells were transfected with control or FGF1 siRNA for 72 hours, and knockdown of FGF1 expression was validated by qRT-PCR. Transfected cells were treated with PBS vehicle (Ctrl), DLL4 (Notch-a), and/or recombinant FGF1 and assessed for (B) migration by the scratch assay and (C) cell invasion by the transwell invasion assay. Shown is the mean +/- SEM from 1 independent experiment performed in triplicate, with all treatment groups compared to control for each transfection group. ** p<0.01.
